# Supplementary material for: DNA Methylation Analysis in Plasma Cell-Free DNA and Paired CTCs of NSCLC Patients before and after Osimertinib Treatment
Source: Cancers (Basel). 2021 Nov 27;13(23):5974. doi: 10.3390/cancers13235974 (PMC8656722; doi:10.3390/cancers13235974)
Supplement: Supplementary file 1 [file cancers-13-05974-s001.zip › cancers-1451801-supplementary.pdf]

## Article

# DNA Methylation Analysis in Plasma Cell-Free DNA and Paired CTCs of NSCLC Patients before and after Osimertinib Treatment

Aliki Ntzifa <sup>1</sup>, Dora Londra <sup>1</sup>, Theodoros Rampias <sup>2</sup>, Athanasios Kotsakis <sup>3</sup>, Vassilis Georgoulas <sup>4</sup> and Evi Lianidou <sup>1,\*</sup>

<sup>1</sup> Analysis of Circulating Tumor Cells Lab, Lab of Analytical Chemistry, Department of Chemistry, National and Kapodistrian University of Athens, 15771 Athens, Greece; alntzi@chem.uoa.gr (A.N.); doralo@chem.uoa.gr (D.L.)

<sup>2</sup> Basic Research Center, Biomedical Research Foundation of the Academy of Athens, 11527 Athens, Greece; trampias@bioacademy.gr

<sup>3</sup> Faculty of Medicine, School of Health Sciences, University of Thessaly, 41110 Larissa, Thessaly, Greece; thankotsakis@uth.gr

<sup>4</sup> Department of Medical Oncology, Hellenic Oncology Research Group (HORG), 11471 Athens, Greece; georgulv@otenet.gr

\* Correspondence: lianidou@chem.uoa.gr; Tel.: +30-210-727-4311

## Supplementary

### Real-time MSP Protocols

#### APC

FORWARD: 5'-TTATTGCGGAGTGCGGGT-3'

REVERSE: 5'-CGAACTCCCGACGAAAATAAA-3'

The PCR reaction mix consisted of 1X PCR buffer (Promega, USA), 2.0 mM MgCl<sub>2</sub> (Promega, USA), 0.15 μM of each dNTP (Invitrogen, USA), 0.15 μg/μL BSA (Sigma, Germany), 0.20 μM of each primer (Integrated DNA Technologies, USA), 1X LC Green® (Idaho Technology, USA) and 0.05 U/μL GoTaq® DNA polymerase (Promega, USA). dH<sub>2</sub>O was added to a final volume of 10 μL. Protocol conditions were: 1 cycle at 95°C for 2min, followed by 45 cycles of: 95°C for 10s, 66°C for 15s and 72°C for 20s, and a final cooling cycle at 40°C for 30s.

#### RASSF10

FORWARD: 5'-CGTCGTTTTAGTAGATTTTCGGTC-3'

REVERSE: 5'-CGTCGAAACAAATAATACGACG-3'

The PCR reaction mix consisted of 1X PCR buffer (Promega, USA), 2mM MgCl<sub>2</sub> (Promega, USA), 0.2 μM of each dNTP (Invitrogen, USA), 0.25 μg/μL BSA (Sigma, Germany), 0.25 μM of each primer (Integrated DNA Technologies, USA), 1X LC Green® (Idaho Technology, USA) and 0.05 U/μL GoTaq® DNA polymerase (Promega, USA). dH<sub>2</sub>O was added to a final volume of 10 μL. Protocol conditions were: 1 cycle at 95°C for 2min, followed by 45 cycles of: 95°C for 10s, 65°C for 20s and 72°C for 20s, and a final cooling cycle at 40°C for 30s.

#### SHISA3

FORWARD: 5'-TAGTTTTAGAGGCGCGATTC-3'

REVERSE: 5'-CAAATACAAACGACCGCG-3'

The PCR reaction mix consisted of 1X PCR buffer (Promega, USA), 2.5 mM MgCl<sub>2</sub> (Promega, USA), 0.2 μM of each dNTP (Invitrogen, USA), 0.25 μg/μL BSA (Sigma, Germany), 0.25 μM of each primer (Integrated DNA Technologies, USA), 1X LC Green® (Idaho Technology, USA) and 0.05 U/μL GoTaq® DNA polymerase (Promega,

**Citation:** Ntzifa, A.; Londra, D.; Rampias, T.; Kotsakis, A.; Georgoulas, V.; Lianidou, E. DNA Methylation Analysis in Plasma Cell-Free DNA and Paired CTCs of NSCLC Patients before and after Osimertinib Treatment. *Cancers* **2021**, *13*, 5974. <https://doi.org/10.3390/cancers13235974>

Academic Editor: David Wong

Received: 21 October 2021

Accepted: 25 November 2021

Published: 27 November 2021

**Publisher's Note:** MDPI stays neutral with regard to jurisdictional claims in published maps and institutional

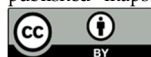

**Copyright:** © 2021 by the authors. Licensee MDPI, Basel, Switzerland. This article is an open access article distributed under the terms and conditions of the Creative Commons Attribution (CC BY) license (<http://creativecommons.org/licenses/by/4.0/>).

USA). dH<sub>2</sub>O was added to a final volume of 10 µL. Protocol conditions were: 1 cycle at 95°C for 2min, followed by 45 cycles of: 95°C for 10s, 63°C for 20s and 72°C for 20s, and a final cooling cycle at 40°C for 30s.

#### *FOXA1*

FORWARD: 5'- GGCGGCGACGTTAAGAC -3'

REVERSE: 5'- CGCTCAACGTAAACATCTTACT -3'

The PCR reaction mix consisted of 1X PCR buffer (Promega, USA), 2.0 mM MgCl<sub>2</sub> (Promega, USA), 0.15 µM of each dNTP (Invitrogen, USA), 0.15 µg/µL BSA (Sigma, Germany), 0.20 µM of each primer (Integrated DNA Technologies, USA), 1X LC Green® (Idaho Technology, USA) and 0.05 U/µL GoTaq® DNA polymerase (Promega, USA). dH<sub>2</sub>O was added to a final volume of 10 µL. Protocol conditions were: 1 cycle at 95°C for 2min, followed by 45 cycles of: 95°C for 10s, 66°C for 20s and 72°C for 20s, and a final cooling cycle at 40°C for 30s.

#### *RARβ*

FORWARD: 5'- CGAGAACGCGAGCGATTC -3'

REVERSE: 5'- TCGACCAATCCAACCGAAAC -3'

The PCR reaction mix consisted of 1X PCR buffer (Promega, USA), 2.0 mM MgCl<sub>2</sub> (Promega, USA), 0.15 µM of each dNTP (Invitrogen, USA), 0.15 µg/µL BSA (Sigma, Germany), 0.20 µM of each primer (Integrated DNA Technologies, USA), 1X LC Green® (Idaho Technology, USA) and 0.05 U/µL GoTaq® DNA polymerase (Promega, USA). dH<sub>2</sub>O was added to a final volume of 10 µL. Protocol conditions were: 1 cycle at 95°C for 2min, followed by 45 cycles of: 95°C for 10s, 65°C for 15s and 72°C for 20s, and a final cooling cycle at 40°C for 30s.

#### *WIF-1*

FORWARD: 5'- TTATACGTTTATTTTCGCGGGC -3'

REVERSE: 5'- GACCGCCACTTAAAAACGCT -3'

PROBE: 56-FAM/ ATTGT+GAATGTAGTT +TCGGGGGTT/3BHQ\_1

The PCR reaction mix consisted of 1X PCR buffer (Promega, USA), 3.0 mM MgCl<sub>2</sub> (Promega, USA), 0.15 µM of each dNTP (Invitrogen, USA), 0.15 µg/µL BSA (Sigma, Germany), 0.20 µM of each primer (Integrated DNA Technologies, USA), 0.30 µM of LNA probe (Integrated DNA Technologies, USA) and 0.05 U/µL GoTaq® DNA polymerase (Promega, USA). dH<sub>2</sub>O was added to a final volume of 10 µL. Protocol conditions were: 1 cycle at 95°C for 2min, followed by 45 cycles of: 95°C for 10s, 58°C for 15s and 72°C for 20s, and a final cooling cycle at 40°C for 30s.
